# Supplementary material
Source: PubMed Central journal article supplement (PMC1356305)
Supplement: 7600864s1.pdf [file 7600864s1.pdf]

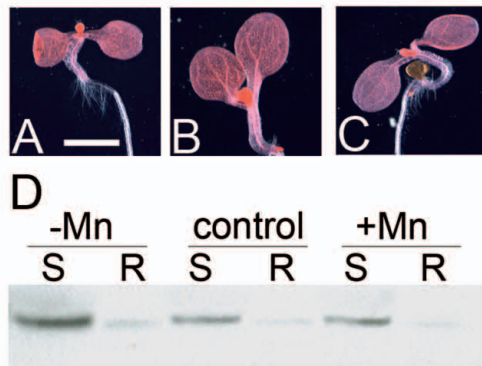

Lanquar et al.; figure S1

**Figure S1:** Regulation of AtNRAMP4 expression by Mn

(A-C) Histochemical staining of GUS reporter gene activity in *proAtNRAMP4*-GUS seedlings counterstained with eosin grown for 7 days either on iron replete medium (ABIS + 100  $\mu$ M FeHBED, A) containing either 0 nominal Mn (A), or 0.1 mM Mn (B), or 1 mM Mn (C). Scale bar is 5 mm. (D) AtNRAMP4 protein is up-regulated under Mn starvation. Western blot showing abundance of AtNRAMP4 protein in roots (R) and shoots (S) of *Arabidopsis thaliana* seedlings, 7 days after transfer to Mn starvation (-Mn), Mn replete (control, 0.1 mM Mn) or Mn excess (+Mn, 1 mM Mn) conditions. Seedlings were grown on control medium for 7 days before transfer. 20  $\mu$ g of proteins were loaded in each lane. Growth conditions as in Figure 1E & F.
