# Supplementary material
Source: PubMed Central journal article supplement (PMC1356305)
Supplement: 7600864s4.pdf [file 7600864s4.pdf]

Table S1: oligonucleotides

| name       | sequence                                                                             |
|------------|--------------------------------------------------------------------------------------|
| NR4-KOS    | 5'-AGC ATT TCT GAA TTC CGA CTC TTG AGA ATC-3'                                        |
| NR4-KOR    | 5'-GTC TCT TTG CTT TTC CTT TAC TCA CTC AT-3'                                         |
| JL202      | 5'-CAT TTT ATA ATA ACG CTG CGG ACA TCT AC-3'                                         |
| NR2-4S     | 5'-CTG ATA GAG AGC GTC CGT TAT TAG C-3'                                              |
| JL270      | 5'-TTT CTC CAT ATT GAC CAT CAT ACT CAT TG-3'                                         |
| NR3BamH1S  | 5'-CGG GAT CCA TGC CAC AAC TCG AGA AC-3'                                             |
| NR3-SalR   | 5'-GTG TGC ACT CAA TGA CTA GAC TCC-3'                                                |
| NR4BamH1S  | 5'-CGG GAT CCA TGT CGG AGA CTG ATA G-3'                                              |
| NR4-SalR   | 5'-GTG TGC ACT CAC TCA TCA TCC CTC-3'                                                |
| proNR1S    | 5'-CTT ATT TAC AAT GGT TGC CAC TGG-3'                                                |
| cmymcNR1-R | 5'-CTT AAA GAT CCT CTT CTG AGA TAA GCT TTT GCT<br>CAT GAC TAG ACT CCG CTT TGA ACG-3' |
| proNR2S    | 5'-GGT CCA ACA CTT GAT GTT GAT TGG C-3'                                              |
| proNR2R    | 5'-GGT AAC CGC CGA TTC TCA GAG TC-3'                                                 |
| cmymcNR2-R | 5'-CTT AAA GAT CCT CTT CTG AGA TAA GCT TTT GCT<br>CAC TCA TCA TCC CTC TGT GG-3'      |
